# Supplementary material for: Single-cell transcriptional profiling of splenic fibroblasts reveals subset-specific innate immune signatures in homeostasis and during viral infection
Source: PubMed Central journal article supplement (PMC8640036; doi:10.1038/s42003-021-02882-9), 2021-12-02
Supplement: 42003_2021_2882_MOESM2_ESM.pdf [file 42003_2021_2882_MOESM2_ESM.pdf]

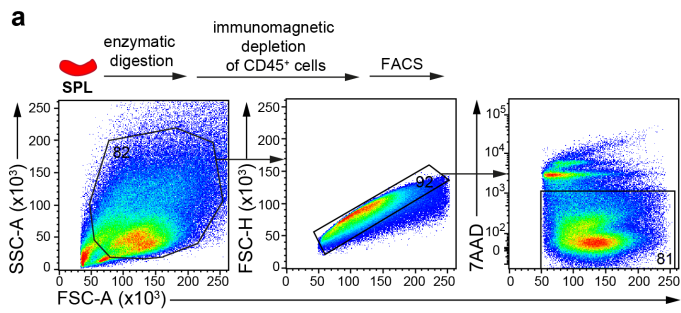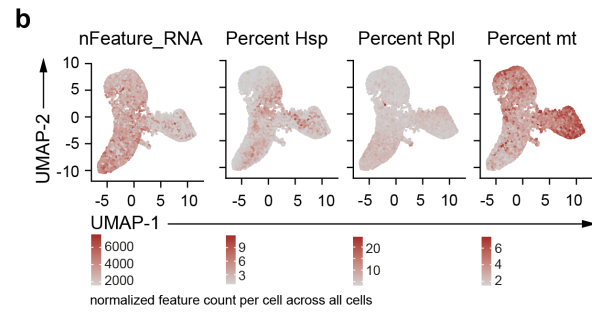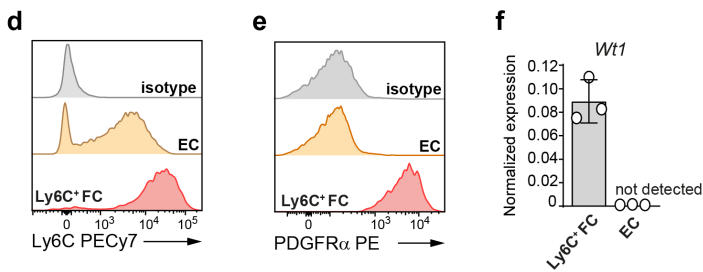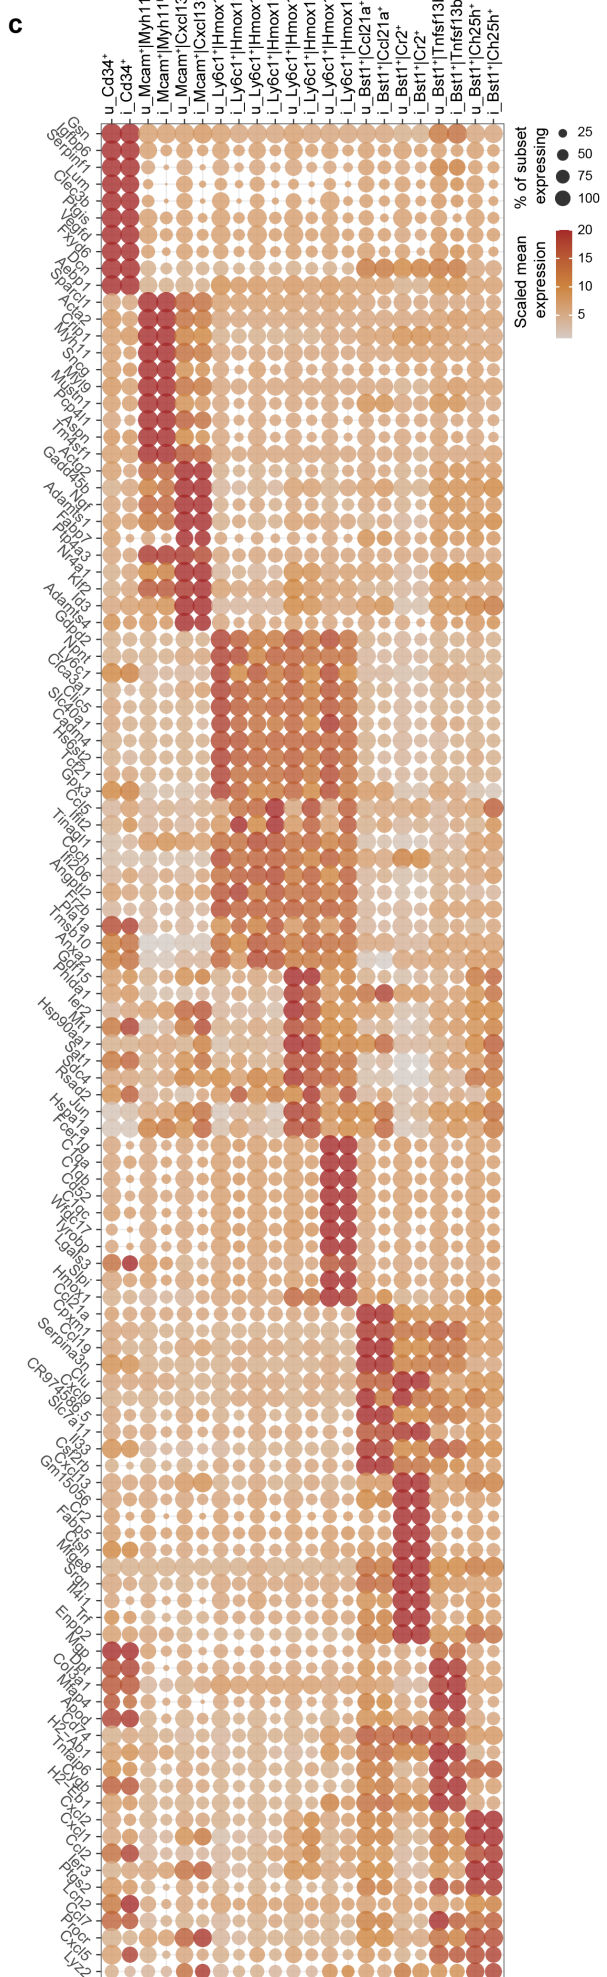

**Supplementary Figure 1.** Related to Figures 1-4.

**a** Pre-gating strategy used to identify singlet, live cells in single-cell preparations from digested adult mouse spleen. Numbers are percentage of cells in the indicated gates. **b** Quality metrics of the scRNA-seq analysis of splenic FC from untreated mice. Shown are number of detected genes (nFeature), percentage of reads for heat-shock proteins (Hsp), percentage of reads mapping to large ribosomal subunit proteins (Rpl) or percentage of mitochondrial reads (mt) per cell superimposed on UMAP embedding. **c** Top 10 DEGs per indicated FC cluster in (u) untreated mice or (i) mice 24 hours post infection with 10<sup>6</sup> PFU MCMV *i.p.* across all FC from the same condition. Colours denote mean scaled expression per cluster. The size of each dot correlates with the percentage of cells in cluster expressing the indicated gene. **d, e** Flow cytometric analysis of **d** Ly6C or **e** PDGFR $\alpha$  expression in Ly6C<sup>+</sup> FC or endothelial cells (EC). Representative stains from 3 mice. **f** RT-qPCR analysis of *Wt1* expression in Ly6C<sup>+</sup> FC or EC. Bars denote arithmetic mean  $\pm$  SD of n = 3 biological replicates (depicted as symbols) using cells sorted from 2 mice/replicate.

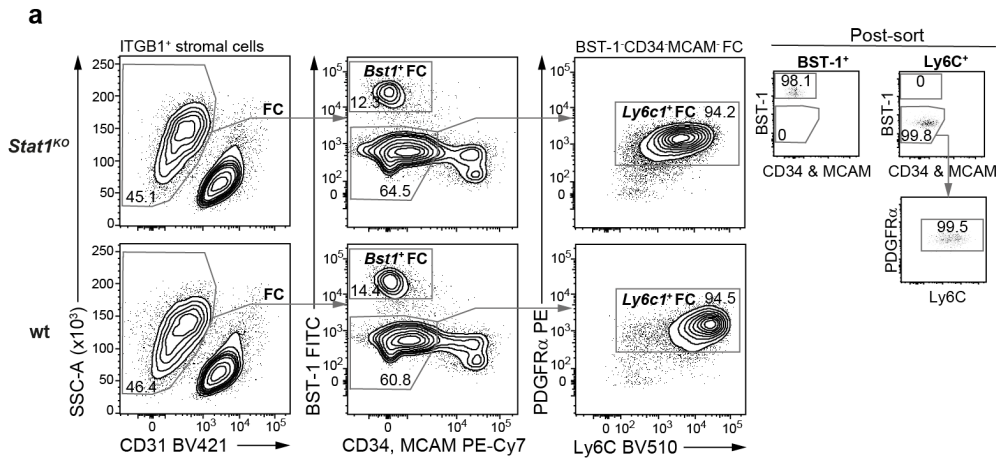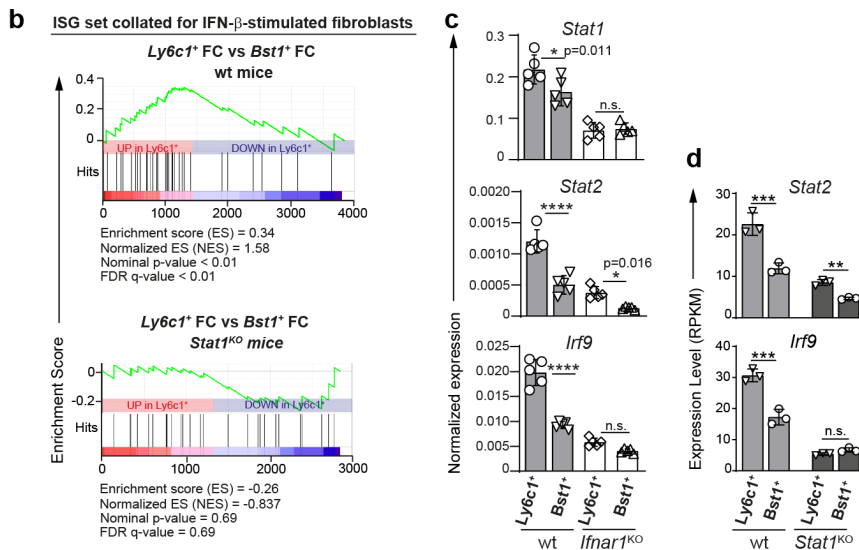

**Supplementary Figure 2.** Related to Figures 5-6.

**a** FACS gating on *Ly6c1*<sup>+</sup> FC and *Bst1*<sup>+</sup> FC in *Stat1*<sup>KO</sup> mice. Numbers are percentage of cells in the indicated gates.

**b** Gene set enrichment analysis for IFN- $\beta$ -stimulated gene set collated for primary fibroblasts (extracted from the Interferome database v2.0 using the following search criteria: fold change > 2.5; p-val < 0.05; max. 6 hours post stimulation (<http://www.interferome.org>)) performed on DEGs ( $\log_2$ (fold change) > 0.8, adj. p-val < 0.05) from the comparison between *Ly6c1*<sup>+</sup> FC versus *Bst1*<sup>+</sup> FC in wt or *Stat1*<sup>KO</sup> mice.

**c** Expression of indicated IFNAR signalling mediators, based on RT-qPCR analysis of *Ly6c1*<sup>+</sup> FC and *Bst1*<sup>+</sup> FC isolated from the spleens of wt or *Ifnar1*<sup>KO</sup> mice. Bars denote mean  $\pm$  SD of n = 5 mice (depicted as symbols). Statistical significance was calculated using one-way ANOVA with Sidak's multiple comparison test.

**d** Expression of indicated IFNAR signalling mediators, based on RNA-seq analysis of *Ly6c1*<sup>+</sup> FC and *Bst1*<sup>+</sup> FC isolated from the spleens of wt mice or *Stat1*<sup>KO</sup> mice. Bars denote mean RPKM  $\pm$  SD of n = 3 biological replicates (depicted as symbols) using cells sorted from 2-4 mice per replicate. Shown are adjusted p-values from the comparison between *Ly6c1*<sup>+</sup> FC versus *Bst1*<sup>+</sup> FC transcriptomes in the wt or the *Stat1*<sup>KO</sup> condition.

**c, d** \* p<0.05; \*\* p<0.01; \*\*\* p<0.001; \*\*\*\* p<0.0001; n.s. denotes p>0.05

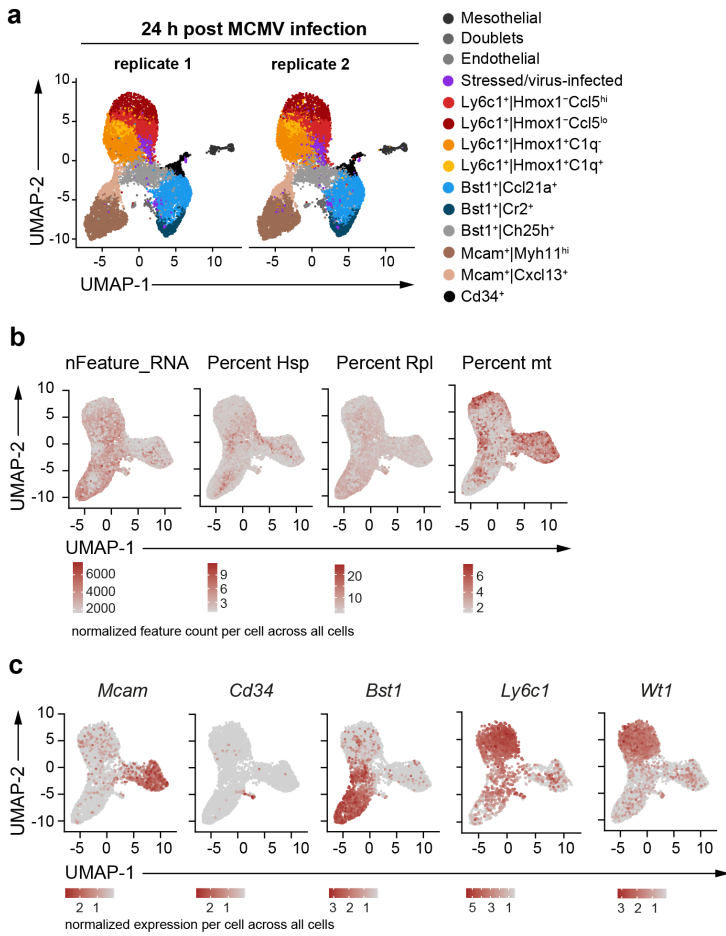

**Supplementary Figure 3.** Related to Figure 7.

**a-c** scRNA-seq analysis of splenic FC 24 hours post infection with  $10^6$  PFU of MCMV *i.p.* **a** UMAP embedding before removal of doublets, endothelial-, mesothelial- and virus-infected cells. **b** Number of detected genes (nFeature), percentage of reads for heat-shock proteins (Hsp), percentage of reads mapping to large ribosomal subunit proteins (Rpl) or percentage of mitochondrial reads (mt) per cell superimposed on UMAP embedding. **c** Gene expression on UMAP embedding in the infected condition.

| ISGs     | Wt mice                                                                      |             | Stat1 <sup>KO</sup> mice                                                     |             |
|----------|------------------------------------------------------------------------------|-------------|------------------------------------------------------------------------------|-------------|
|          | log <sub>2</sub> (fold change) Ly6c1 <sup>+</sup> FC vs Bst1 <sup>+</sup> FC | adj. p-val  | log <sub>2</sub> (fold change) Ly6c1 <sup>+</sup> FC vs Bst1 <sup>+</sup> FC | adj. p-val  |
| Rtp4     | 3.776                                                                        | 6.93E-43    | 6.285                                                                        | 2.17E-27    |
| Ifit3    | 3.235                                                                        | 4.69E-28    | 2.129                                                                        | 4.30E-49    |
| Ifit1    | 3.119                                                                        | 4.18E-32    | 1.686                                                                        | 0.001317706 |
| Plac8    | 2.731                                                                        | 3.25E-22    | 1.817                                                                        | 4.24E-23    |
| Cmpk2    | 2.420                                                                        | 8.27E-74    | 2.381                                                                        | 1.97E-66    |
| Oas1a    | 2.239                                                                        | 3.14E-22    | 0.000                                                                        | 1           |
| Isg15    | 2.165                                                                        | 9.57E-19    | -0.329                                                                       | 0.286874755 |
| Gbp3     | 2.109                                                                        | 2.41E-30    | 1.724                                                                        | 3.73E-16    |
| Xaf1     | 2.073                                                                        | 1.96E-20    | 0.962                                                                        | 1.02E-10    |
| Irf7     | 1.930                                                                        | 4.69E-16    | 1.698                                                                        | 1.72E-29    |
| Spats2l  | 1.892                                                                        | 1.08E-29    | 1.932                                                                        | 4.79E-11    |
| Rsad2    | 1.798                                                                        | 1.39E-12    | 3.469                                                                        | 7.3905E-05  |
| Lgals9   | 1.790                                                                        | 3.29E-24    | 0.737                                                                        | 8.28E-18    |
| Tmem140  | 1.759                                                                        | 5.77E-12    | 1.542                                                                        | 0.000102696 |
| Zbp1     | 1.755                                                                        | 4.42E-12    | -0.750                                                                       | 0.008939974 |
| Ifit3    | 1.577                                                                        | 2.56E-09    | 0.847                                                                        | 7.93E-21    |
| Gbp4     | 1.550                                                                        | 7.92E-24    | 0.396                                                                        | 0.581391389 |
| Rnf213   | 1.435                                                                        | 1.20E-11    | 0.456                                                                        | 0.152926136 |
| Ifi44    | 1.421                                                                        | 4.35E-11    | -5.897                                                                       | 0.005285034 |
| Ly6e     | 1.416                                                                        | 8.48E-14    | 0.432                                                                        | 4.55343E-11 |
| Ddx60    | 1.404                                                                        | 1.93E-12    | 0.356                                                                        | 0.35772351  |
| Ifit2    | 1.392                                                                        | 5.10E-08    | 0.682                                                                        | 5.61E-12    |
| Agm      | 1.350                                                                        | 0.003024882 | 0.806                                                                        | 0.002022399 |
| Parp14   | 1.325                                                                        | 6.00E-08    | 1.268                                                                        | 4.76171E-05 |
| Zcchc24  | 1.295                                                                        | 3.39E-06    | 1.397                                                                        | 2.60E-38    |
| Mx2      | 1.293                                                                        | 0.000751404 | 1.719                                                                        | 0.008415425 |
| Ifi2     | 1.263                                                                        | 2.20E-08    | 0.625                                                                        | 0.0581921   |
| Phf11b   | 1.243                                                                        | 0.000476852 | 0.669                                                                        | 0.249007739 |
| Trim25   | 1.213                                                                        | 1.85E-06    | 0.929                                                                        | 0.001642548 |
| Ifit1    | 1.195                                                                        | 0.000276969 | 0.037                                                                        | 0.821690635 |
| Mikl     | 1.173                                                                        | 1.03E-11    | 0.674                                                                        | 0.051807094 |
| Parp12   | 1.169                                                                        | 1.93E-28    | 0.254                                                                        | 0.699968757 |
| Rnf114   | 1.146                                                                        | 2.32E-18    | 0.504                                                                        | 3.58415E-05 |
| Usp18    | 1.137                                                                        | 0.00015923  | -0.765                                                                       | 0.025493647 |
| Sifn5    | 1.077                                                                        | 5.70E-05    | 1.322                                                                        | 2.35E-14    |
| Phf11d   | 1.075                                                                        | 1.84E-09    | -0.278                                                                       | 0.198582662 |
| Ifi35    | 1.025                                                                        | 2.25E-05    | 0.279                                                                        | 0.075168912 |
| Tnfrsf10 | 0.960                                                                        | 0.04825153  | 0.398                                                                        | 0.679097299 |
| Stat2    | 0.923                                                                        | 2.60E-09    | 0.861                                                                        | 0.001569826 |
| Trim21   | 0.899                                                                        | 2.13E-07    | 2.980                                                                        | 0.005067653 |
| Ifih1    | 0.869                                                                        | 1.20E-11    | 0.222                                                                        | 0.322400559 |
| Eif2ak2  | 0.844                                                                        | 0.00060729  | 0.107                                                                        | 0.819661336 |
| Samd9l   | 0.841                                                                        | 8.66E-10    | -0.166                                                                       | 0.601906348 |
| Dhx58    | 0.832                                                                        | 0.000126611 | 0.035                                                                        | 0.972571033 |
| Irf9     | 0.829                                                                        | 2.10E-06    | -0.312                                                                       | 0.212880211 |
| Sat1     | 0.822                                                                        | 1.16E-11    | 1.558                                                                        | 8.33E-31    |
| Parp10   | 0.753                                                                        | 5.15E-06    | 0.930                                                                        | 0.025892372 |
| Cnp      | 0.703                                                                        | 6.38E-06    | 0.944                                                                        | 1.31E-08    |
| Parp9    | 0.683                                                                        | 1.17E-07    | -0.107                                                                       | 0.793685179 |
| Atp10a   | 0.676                                                                        | 0.245699711 | 0.964                                                                        | 0.564600977 |
| Dtx3l    | 0.675                                                                        | 0.049529815 | 0.069                                                                        | 0.936476322 |
| Scarb2   | 0.674                                                                        | 4.35E-06    | 0.574                                                                        | 1.99E-14    |
| Fbxo6    | 0.655                                                                        | 0.005837012 | 0.433                                                                        | 0.120868253 |
| Gbp2     | 0.566                                                                        | 7.18E-06    | 0.500                                                                        | 0.004266245 |
| Zc3hav1  | 0.527                                                                        | 3.96E-08    | 0.153                                                                        | 0.147412801 |
| Psmc2    | 0.514                                                                        | 0.05725131  | -0.056                                                                       | 0.866395447 |
| Chmp5    | 0.504                                                                        | 0.000257715 | 0.269                                                                        | 0.103556815 |
| Adar     | 0.464                                                                        | 0.244573091 | 0.036                                                                        | 0.981364291 |
| Acot9    | 0.458                                                                        | 0.015137002 | 0.167                                                                        | 0.630351861 |
| Tmem106a | 0.446                                                                        | 0.042776103 | 0.196                                                                        | 0.207427517 |
| Psmc1    | 0.396                                                                        | 0.009505137 | -0.027                                                                       | 0.920311469 |
| Gbp6     | 0.391                                                                        | 0.048587847 | -0.691                                                                       | 0.088445103 |
| Gbp5     | 0.336                                                                        | 0.230637709 | 0.387                                                                        | 0.378482139 |
| Unc93b1  | 0.333                                                                        | 0.006382631 | -0.196                                                                       | 0.65845475  |
| Myd88    | 0.321                                                                        | 0.062127335 | 0.220                                                                        | 0.345129693 |
| Ube2l6   | 0.270                                                                        | 0.304295277 | -0.442                                                                       | 0.000950503 |
| Gsdmd    | 0.258                                                                        | 0.06256598  | 0.311                                                                        | 0.158642212 |
| Rab24    | 0.203                                                                        | 0.467691547 | -1.139                                                                       | 0.022104957 |
| Anky1    | 0.182                                                                        | 0.78942167  | 0.113                                                                        | 0.785947397 |
| Sp140    | 0.167                                                                        | 0.680294345 | 0.023                                                                        | 0.971973367 |
| Samhd1   | 0.156                                                                        | 0.312458174 | -0.111                                                                       | 0.536120397 |
| Bst2     | 0.132                                                                        | 0.57588507  | -1.517                                                                       | 3.81E-26    |
| B2m      | 0.118                                                                        | 0.541853297 | -0.975                                                                       | 3.90E-16    |
| Irf1     | 0.118                                                                        | 0.579921157 | 1.399                                                                        | 2.70E-19    |
| Lap3     | 0.079                                                                        | 0.69339683  | 0.054                                                                        | 0.877140009 |
| Tdrd7    | 0.077                                                                        | 0.775181231 | -0.187                                                                       | 0.726626325 |
| Sp110    | -0.024                                                                       | 0.932055876 | -0.538                                                                       | 0.066958384 |
| Bag1     | -0.026                                                                       | 0.9167317   | -0.674                                                                       | 0.135394211 |
| Ddx58    | -0.054                                                                       | 0.798735084 | -0.590                                                                       | 2.79188E-05 |
| Znfx1    | -0.077                                                                       | 0.913316284 | -0.222                                                                       | 0.720211365 |
| Lgals3bp | -0.080                                                                       | 0.644637116 | -1.911                                                                       | 4.27E-85    |
| Nod1     | -0.212                                                                       | 0.368998841 | -0.159                                                                       | 0.676973253 |
| Psmb8    | -0.219                                                                       | 0.496817363 | -0.995                                                                       | 2.00E-31    |
| N4bp1    | -0.288                                                                       | 0.245197809 | -0.080                                                                       | 0.930491534 |
| Psmb9    | -0.387                                                                       | 0.10403244  | -0.816                                                                       | 4.10E-10    |
| Nub1     | -0.463                                                                       | 2.54E-07    | -0.491                                                                       | 0.082969968 |
| Traf1d1  | -0.729                                                                       | 3.18E-08    | -1.200                                                                       | 5.08E-08    |
| Tap1     | -0.762                                                                       | 8.75E-10    | -1.476                                                                       | 3.75E-28    |
| Ly96     | -0.924                                                                       | 3.05E-08    | -1.578                                                                       | 2.29E-14    |
| Casp1    | -0.978                                                                       | 1.08E-08    | -1.011                                                                       | 3.26617E-05 |
| Serpinb9 | -1.175                                                                       | 7.71E-24    | -1.776                                                                       | 9.1971E-125 |
| Epsst1   | -1.191                                                                       | 0.052868151 | -0.602                                                                       | 0.719587324 |
| Casp4    | -1.266                                                                       | 1.82E-10    | -1.676                                                                       | 1.27E-13    |
| Isg20    | -1.288                                                                       | 1.43E-06    | -2.206                                                                       | 2.51E-31    |
| Stambp1  | -1.551                                                                       | 1.87E-20    | -1.243                                                                       | 0.00599388  |
| Vrk2     | -1.625                                                                       | 6.18E-26    | -1.417                                                                       | 3.44E-06    |
| Lysmd2   | -1.836                                                                       | 6.17E-15    | -1.635                                                                       | 5.23E-40    |
| Map3k8   | -2.089                                                                       | 1.19E-32    | -0.859                                                                       | 0.000234561 |
| Abtb2    | -2.249                                                                       | 2.74E-13    | -1.497                                                                       | 0.26401582  |
| Lcp2     | -3.622                                                                       | 3.32E-36    | -2.891                                                                       | 1.26925E-09 |

**Supplementary Table 1.** Related to Fig. 6

Shown are fold changes in the expression of individual ISGs between *Ly6c1*<sup>+</sup> FC versus *Bst1*<sup>+</sup> FC in wt or *Stat1*<sup>KO</sup> mice. ISGs that are no longer overexpressed in *Ly6c1*<sup>+</sup> FC upon loss of *Stat1* are highlighted in grey.

| Antibody                                                                   | Source                  | Cat. No.           |
|----------------------------------------------------------------------------|-------------------------|--------------------|
| APC/Cy7 anti-mouse ITGB1 (HMβ1-1)                                          | BioLegend               | Cat# 102226        |
| FITC anti-mouse ITGB1 (HMβ1-1)                                             | BioLegend               | Cat# 102205        |
| Biotin anti-mouse ITGB1 (HMβ1-1)                                           | BioLegend               | Cat# 102203        |
| Alexa Fluor 700 anti-mouse CD45.2 (104)                                    | BioLegend               | Cat# 109822        |
| Brilliant Violet 510 anti-mouse CD45.2 (104)                               | BioLegend               | Cat# 109838        |
| Biotin anti-mouse CD34 (RAM34)                                             | Thermo Fisher           | Cat# 13-0341-82    |
| eFluor 660 anti-mouse CD34 (RAM34)                                         | Thermo Fisher           | Cat# 50-0341-82    |
| PE/Cy7 anti-mouse MCAM (ME-9F1)                                            | BioLegend               | Cat# 134714        |
| Alexa Fluor 647 anti-mouse MCAM (ME-9F1)                                   | BioLegend               | Cat# 134718        |
| Purified anti-mouse BST-1 (BP-3)                                           | BioLegend               | Cat# 140202        |
| PE anti-mouse BST-1 (BP-3)                                                 | BioLegend               | Cat# 140204        |
| APC anti-mouse BST-1 (BP-3)                                                | BioLegend               | Cat# 140207        |
| FITC anti-mouse BST-1 (KT157)                                              | Thermo Fisher           | Cat# MA5-17948     |
| PE anti-mouse PDGFRα (APA5)                                                | BioLegend               | Cat# 135906        |
| PE/Cy7 anti-mouse CR2/CR1 (7E9)                                            | BioLegend               | Cat# 123419        |
| PE/Cy7 anti-mouse Ly6C (HK1.4)                                             | BioLegend               | Cat# 128017        |
| Brilliant Violet 510 anti-mouse Ly6C (HK1.4)                               | BioLegend               | Cat# 128033        |
| Brilliant Violet 785 anti-mouse Ly6C (HK1.4)                               | BioLegend               | Cat# 128041        |
| Biotin anti-mouse Ly-6C (HK1.4)                                            | BioLegend               | Cat# 128003        |
| BV421 anti-mouse/human CD45R/B220 (RA3-6B2)                                | BioLegend               | Cat# 103251        |
| APC anti-mouse CD71 (RI7217)                                               | BioLegend               | Cat# 113819        |
| BV421 anti-mouse CD31 (MEC13.3)                                            | BD Horizon              | Cat# 562939        |
| Biotin anti-mouse Pan-endothelial Cell Antigen (MECA-32)                   | BioLegend               | Cat# 120504        |
| Alexa Fluor 488 anti-mouse Pan-endothelial Cell Antigen Antibody (MECA-32) | BioLegend               | Cat# 120506        |
| PE Rat IgG2a Isotype Ctrl (RTK2758)                                        | BioLegend               | Cat# 400507        |
| PE/Cy7 Rat IgG2a, κ Isotype Ctrl (RTK2758)                                 | BioLegend               | Cat# 400521        |
| APC Rat IgG2a, κ Isotype Ctrl (RTK2758)                                    | BioLegend               | Cat# 400511        |
| PE/Cy7 Rat IgG2c, κ Isotype Ctrl (RTK4174)                                 | BioLegend               | Cat# 400721        |
| Purified Mouse IgG1, κ Isotype Ctrl Antibody (MOPC-21)                     | BioLegend               | Cat# 400101        |
| Polyclonal anti-mouse CCL21                                                | LifeSpan<br>BioSciences | Cat# LS-C104634-50 |
| FITC anti-alpha smooth muscle actin (1A4)                                  | Abcam                   | Cat# ab8211        |
| Purified HMOX1 Monoclonal Antibody (HO-1-1)                                | ThermoFisher            | Cat# MA1-112       |
| APC CXCL13 Monoclonal Antibody (DS8CX13)                                   | ThermoFisher            | Cat# 17-7981-82    |
| Desmin Polyclonal Antibody                                                 | ThermoFisher            | Cat# PA5-16705     |
| anti-mouse WT1 (SC06-41)                                                   | LIFE<br>Technologies    | Cat# MA532215      |
| Rabbit IgG Isotype Control                                                 | Thermo Fisher           | Cat# 10500C        |
| Goat anti-Rabbit IgG (H+L) Secondary, Alexa Fluor 647                      | Thermo Fisher           | Cat# A-21245       |
| Brilliant Violet 785 Streptavidin                                          | BioLegend               | Cat# 405249        |
| PE/Cyanine7 Streptavidin                                                   | BioLegend               | Cat# 405206        |

## Supplementary Table 2. Related to Methods

Antibodies used in the study.

|                | Forward (5' - 3')         | Reverse (5' - 3')      |
|----------------|---------------------------|------------------------|
| <i>Gapdh</i>   | TGTGTCCGTCGTGGATCTGA      | CCTGCTTCACCACCTTCTTGAT |
| <i>Oas1a</i>   | GTCCTGGGTCATGTTAATACTTCCA | GCTCCGTGAAGCAGGTAGAG   |
| <i>Ifit1</i>   | GAGCAGAGAGTCAAGGCAGG      | CACCATCAGCATTCTCTCCA   |
| <i>Ifi44</i>   | TGGCATTCTGCATTTGGCTT      | TCCAGCTTGGACTTCACAGG   |
| <i>Ifih1</i>   | TGCTTATCGCTACGACGGTG      | TTCATCAGCTCTGGCTCGAC   |
| <i>Eif2ak2</i> | TCGTGACCGGAGTGGAGTAT      | GTTGCAAGGCCAAAGTCTCC   |
| <i>Irf7</i>    | GGGACCTCTTGCTTCAGTT       | AGGGTTCCTCGTAAACACGG   |
| <i>Usp18</i>   | CGGACAGACGTGTTGCCTTA      | TCCGAGGCACTGTTATCCTCT  |
| <i>Stat1</i>   | AGAGGTGTTGAGTTGGCAGT      | ACCATCAGGGCCAGCATTAG   |
| <i>Stat2</i>   | CTATTGCTGCCCAAGCTGGA      | AACTTTGCTCCAGCCGTCAA   |
| <i>Irf9</i>    | AGCAACTGCAACTCTGAGCTA     | GTGAGCAGCAGCGAGTAGT    |
| <i>Wt1</i>     | CATCCGCAACCAAGGATACAG     | TGAAGGAATGGTTGGGGAAct  |

**Supplementary Table 3.** Related to Methods

Primer sequences.
