# Supplementary material for: Single-cell transcriptional profiling of splenic fibroblasts reveals subset-specific innate immune signatures in homeostasis and during viral infection
Source: PubMed Central journal article supplement (PMC8640036; doi:10.1038/s42003-021-02882-9), 2021-12-02
Supplement: 42003_2021_2882_MOESM3_ESM.pdf [file 42003_2021_2882_MOESM3_ESM.pdf]

## Description of Additional Supplementary Files

**File name:** Supplementary Data 1

**Description:** Top 100 differentially expressed genes (average  $\log_2(\text{fold change}) > 0.25$ , adjusted p-value  $< 0.01$ , fraction of expressing cells 0.1) with the highest fold change per FC cluster across all cells.

**File name:** Supplementary Data 2

**Description:** Source data for Figures 3f, 4e, 5e, 6c, 6f, 7a, 7b, 7c, 7i and Supplementary Figures 2c and 2d.
